# Supplementary material for: RETRACTED: Protein kinase C is a calcium sensor for presynaptic short-term plasticity
Source: eLife journal article supplement (doi:10.7554/elife.03011), 2014-08-05
Supplement: fig1-data1 [file elife-03011-fig1-data1-v2.docx]

|  |  | **# Cells** | **Mean ± SEM** |
| --- | --- | --- | --- |
| **PTP** | | | |
|  | wt | 16 | 62 ± 12 % |
|  | α ko | 7 | 67 ± 12 % |
|  | αβ dko | 15 | 2.4 ± 1.8 % |
|  | αβ dko + PKCβWT-YFP | 24 | 61 ± 7 % |
| **PDBu** | | | |
|  | wt | 8 | 97 ± 12 % |
|  | α ko | 9 | 60 ± 8 % |
|  | αβ dko | 8 | 3.2 ± 3.4 % |
|  | αβ dko + PKCβWT-YFP | 11 | 84 ± 11 % |
| **PPR ratio (Fig. 1H)** | | | |
|  | wt | 9 | 1.12 ± 0.19 |
|  | αβ dko + PKCβWT-YFP | 9 | 0.99 ± 0.04 |
| p = 0.49 | | | |
| **RRP ratio (Fig. 1I)** | | | |
|  | wt | 9 | 37 ± 9 % |
|  | αβ dko + PKCβWT-YFP | 9 | 39 ± 12 % |
| p = 0.88 | | | |
| **Release probability (*p*) ratio (Fig. 1I)** | | | |
|  | wt | 9 | 1.1 ± 0.05 |
|  | αβ dko + PKCβWT-YFP | 9 | 1.1 ± 0.06 |
| p = 0.78 | | | |

**Figure 1 - source data 1.** Summary and statistical analyses of synaptic properties during PTP and PDBu-induced potentiation.
