# Supplementary material for: RETRACTED: Protein kinase C is a calcium sensor for presynaptic short-term plasticity
Source: eLife journal article supplement (doi:10.7554/elife.03011), 2014-08-05
Supplement: fig1-data2 [file elife-03011-fig1-data2-v2.docx]

|  |  | **# Cells** | **Mean ± SEM** | **Median ± IQR** |
| --- | --- | --- | --- | --- |
| **Basal EPSC (pA)** | | | |  |
|  | wt | 17 | 5127 ± 698 | 4233 ± 3096 |
|  | αβ dko | 14 | 6388 ± 282 | 6187 ± 859 |
|  | αβ dko + PKCβWT-YFP | 32 | 4757 ± 381 | 4417 ± 2078 |
| **Basal PPR** | | | |  |
|  | wt | 17 | 0.90 ± 0.03 | 0.87 ± 0.10 |
|  | αβ dko | 14 | 0.91 ± 0.02 | 0.90 ± 0.10 |
|  | αβ dko + PKCβWT-YFP | 32 | 0.89 ± 0.02 | 0.93 ± 0.09 |
| **Basal mEPSC amplitude (pA)** | | | |  |
|  | wt | 8 |  | 23.5 ± 8.0 |
|  | αβ dko | 8 |  | 28.4 ± 3.1 |
|  | αβ dko + PKCβWT-YFP | 12 |  | 24.9 ± 6.4 |
| **Basal mEPSC frequency** | | | |  |
|  | wt | 8 | 4.0 ± 1.5 | 2.8 ± 2.4 |
|  | αβ dko | 8 | 4.5 ± 0.8 | 4.1 ± 2.2 |
|  | αβ dko + PKCβWT-YFP | 12 | 5.0 ± 1.4 | 3.6 ± 1.9 |
|  | αβ dko + PKCβD/A-YFP | 6 | 3.1 ± 0.6 | 2.7 ± 2.0 |
| p = 0.78 | | | | |
| **Basal RRP size (pA)** | | | |  |
|  | wt | 9 | 15428 ± 2925 | 13877 ± 7565 |
|  | αβ dko + PKCβWT-YFP | 9 | 11711 ± 2542 | 8580 ± 10092 |
| p = 0.35 | | | | |
| **Basal *p*** |  |  |  |  |
|  | wt | 9 | 0.27 ± 0.07 | 0.19 ± 0.19 |
|  | αβ dko + PKCβWT-YFP | 9 | 0.29 ± 0.02 | 0.29 ± 0.05 |
| p = 0.80 | | | | |
|  |  |  |  |  |

**Figure 1 – source data 2.** Summary and statistical analyses of basal synaptic properties.
