# Supplementary material for: RETRACTED: Protein kinase C is a calcium sensor for presynaptic short-term plasticity
Source: eLife journal article supplement (doi:10.7554/elife.03011), 2014-08-05
Supplement: fig3-data1 [file elife-03011-fig3-data1-v2.docx]

|  |  | **# Cells** | **Mean ± SEM** |
| --- | --- | --- | --- |
| **PTP** | | | |
|  | wt | 16 | 62 ± 12 % |
|  | αβ dko + PKCβD/A-YFP | 16 | 3.6 ± 2.2 % |
| wt vs. α ko: p = 0.69  wt vs. αβ dko: p < 0.01  wt vs. αβ dko + PKCβWT-YFP: p = 0.92  wt vs. αβ dko + PKCβD/A-YFP: p < 0.01  αβ dko vs. αβ dko + PKCβWT-YFP: p < 0.01  αβ dko vs. αβ dko + PKCβD/A-YFP: p = 0.91 | | | |
| **PDBu** | | | |
|  | wt | 8 | 97 ± 12 % |
|  | αβ dko + PKCβD/A-YFP | 7 | 98 ± 23 % |
| wt vs. αβ dko + PKCβD/A-YFP: p = 0.99  αβ dko vs. αβ dko + PKCβWT-YFP: p < 0.01  αβ dko vs. αβ dko + PKCβD/A-YFP: p < 0.01 | | | |
|  | | | |

**Figure 3 – source data 1.** Summary and statistical analyses of synaptic properties during PTP and PDBu-induced potentiation.
