# Supplementary material for: RETRACTED: Protein kinase C is a calcium sensor for presynaptic short-term plasticity
Source: eLife journal article supplement (doi:10.7554/elife.03011), 2014-08-05
Supplement: fig3-data2 [file elife-03011-fig3-data2-v2.docx]

|  |  | **# Cells** | **Mean ± SEM** | **Median ± IQR** |
| --- | --- | --- | --- | --- |
| **Basal EPSC (pA)** | | | |  |
|  | wt | 17 | 5127 ± 698 | 4233 ± 3096 |
|  | αβ dko + PKCβD/A-YFP | 16 | 4528 ± 533 | 4330 ± 2087 |
|  | | | | |
| **Basal PPR** | | | |  |
|  | wt | 17 | 0.90 ± 0.03 | 0.87 ± 0.10 |
|  | αβ dko + PKCβD/A-YFP | 16 | 0.95 ± 0.02 | 0.94 ± 0.10 |
|  | | | | |
| **Basal mEPSC amplitude (pA)** | | | |  |
|  | wt | 8 |  | 23.5 ± 8.0 |
|  | αβ dko + PKCβD/A-YFP | 6 |  | 21.3 ± 2.3 |
|  | | | | |
| **Basal mEPSC frequency** | | | |  |
|  | wt | 8 | 4.0 ± 1.5 | 2.8 ± 2.4 |
|  | αβ dko + PKCβD/A-YFP | 6 | 3.1 ± 0.6 | 2.7 ± 2.0 |
|  | | | | |

**Figure 3 – source data 2.** Summary and statistical analyses of basal synaptic properties.
