# Supplementary material for: RETRACTED: Protein kinase C is a calcium sensor for presynaptic short-term plasticity
Source: eLife journal article supplement (doi:10.7554/elife.03011), 2014-08-05
Supplement: figures [file elife-03011-figures-v2.pdf]

---

## Figures and figure supplements

Protein kinase C is a calcium sensor for presynaptic short-term plasticity

**Diasynou Fioravante, et al.**

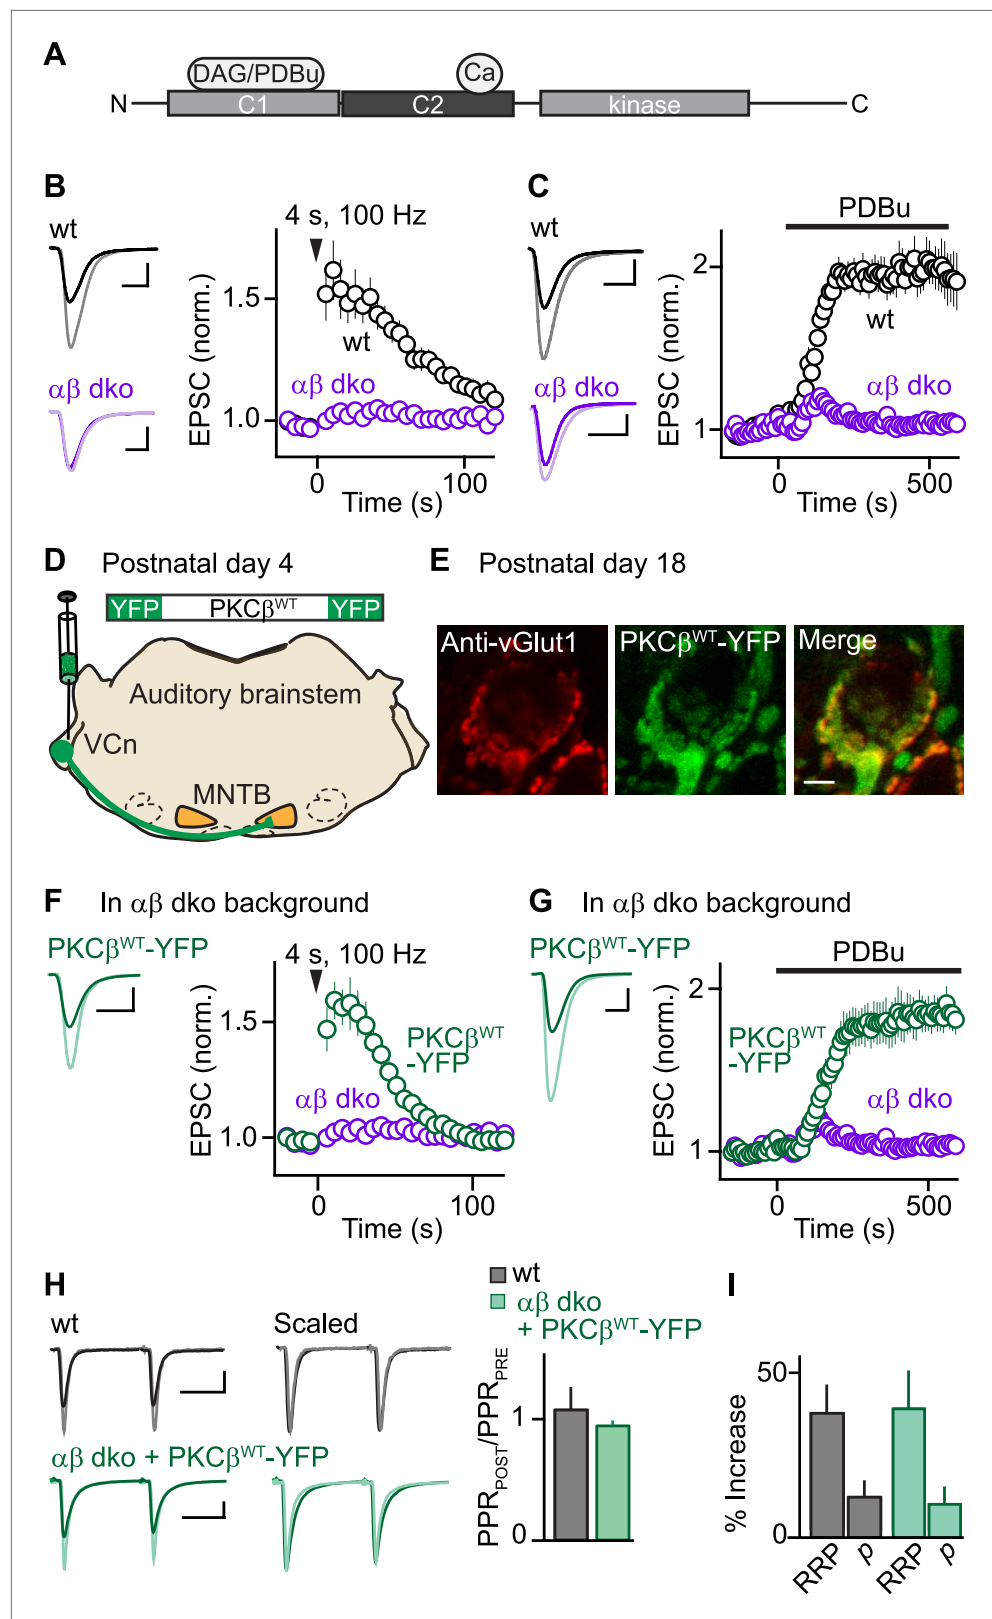

**Figure 1.** Expression of PKC $\beta$  rescues synaptic potentiation in animals lacking calcium-dependent PKCs. Synaptic plasticity was examined at the calyx of Held following tetanic stimulation (**B** and **F**) or bath application of the phorbol ester PDBu (**C** and **G**) for wild-type (wt, black), PKC $\alpha\beta$  dko animals (purple), and PKC $\alpha\beta$  dko animals Figure 1. Continued on next page

Figure 1. Continued

expressing PKC $\beta^{\text{WT}}$ -YFP (green). (A) Domain arrangement of PKC $\alpha$ . DAG and PDBu bind to the C1 domain and Ca $^{2+}$  binds to the C2 domain. (B, C, F, G) Left, example EPSCs recorded prior to (*bold traces*) and after (*light traces*) synaptic enhancement for each experimental condition. Right, EPSCs are plotted as a function of time (mean  $\pm$  SEM). For (B), wild-type:  $62 \pm 12\%$ ;  $\alpha\beta$  dko:  $2.4 \pm 1.8\%$ . Also see **Figure 1—figure supplement 1** and accompanying legend for PTP induced under elevated-temperature conditions. Similar to PTP induced at room temperature, PTP at near-physiological temperature requires PKC $\alpha$  (**Figure 1—figure supplement 2**). For (C), at steady state: wild-type:  $97 \pm 12\%$ ;  $\alpha\beta$  dko:  $3.2 \pm 3.4\%$ ; for (F), PKC $\beta^{\text{WT}}$ -YFP:  $61 \pm 7\%$ ; for (G),  $84 \pm 11\%$ . In F and G, the  $\alpha\beta$  dko group data from B and C respectively are re-plotted for comparison. Also see **Figure 1—figure supplement 3** and **Figure 1—figure supplement 4**. (D) In this schematic of the auditory brainstem, the ventral cochlear nucleus (VCn) and medial nuclei of the trapezoid body (MNTB) are labeled. An AAV expressing PKC $\beta^{\text{WT}}$ -YFP was injected in the VCn at postnatal day 4. (E) Confocal images of a brain section labeled with an antibody against vGlut1 (red) are shown for a calyx of Held expressing PKC $\beta^{\text{WT}}$ -YFP (green) in a PKC $\alpha\beta$  dko animal at postnatal day 18. Scale bar: 10  $\mu\text{m}$ . (H and I) The synaptic mechanism through which PKC $\beta$  rescues PTP was examined under conditions that relieve AMPA receptor desensitization and saturation. (H) Left, overlay of EPSCs (10 ms inter-stimulus interval) delivered prior to (*bold traces*) and 10 s after (*light traces*) PTP-inducing tetanus. Middle, traces are normalized to the first EPSC to allow comparison of PPR. Right, PPR $_{\text{POST}}$  (after tetanus) over PPR $_{\text{PRE}}$  (before tetanus) (mean  $\pm$  SEM, see **Figure 1—source data 1 and 2**). Wild-type:  $p=0.49$ ;  $\alpha\beta$  dko expressing PKC $\beta^{\text{WT}}$ -YFP:  $p=0.68$ . (I) Summary of the readily releasable pool (RRP) and release probability ( $p$ ) contributions to PTP (mean  $\pm$  SEM, also see **Figure 1—figure supplements 5 and 6** and **Figure 1—source data 1 and 2**). RRP $_{\text{WT}}$ :  $37 \pm 9\%$ ; RRP $_{\text{PKC}\beta^{\text{WT}}\text{-YFP}}$ :  $39 \pm 12\%$ ;  $p=0.88$ . Scale bars in B, C, F, and G: 2 nA, 1 ms. Scale bars in H: 2 nA, 5 ms.

DOI: [10.7554/eLife.03011.003](https://doi.org/10.7554/eLife.03011.003)

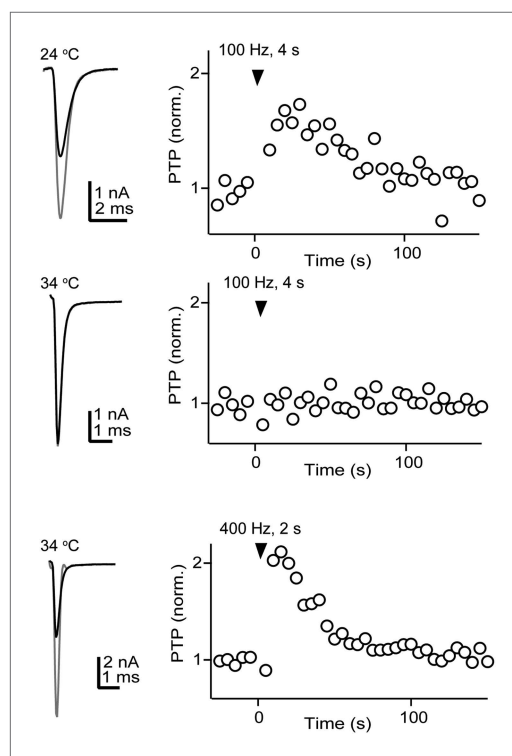

**Figure 1—figure supplement 1.** PTP can be induced under near-physiological conditions.

DOI: [10.7554/eLife.03011.006](https://doi.org/10.7554/eLife.03011.006)

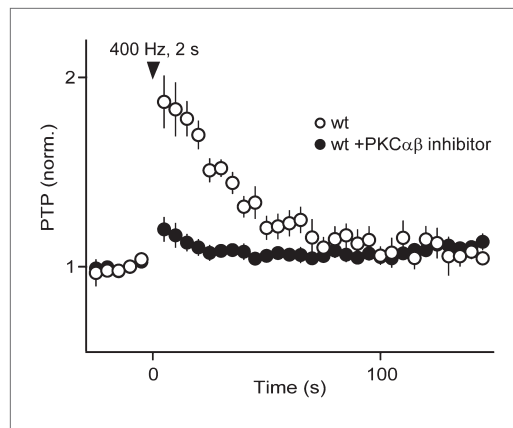

**Figure 1—figure supplement 2.** Under near-physiological conditions PTP is mediated by PKC<sub>Ca</sub>.  
DOI: [10.7554/eLife.03011.007](https://doi.org/10.7554/eLife.03011.007)

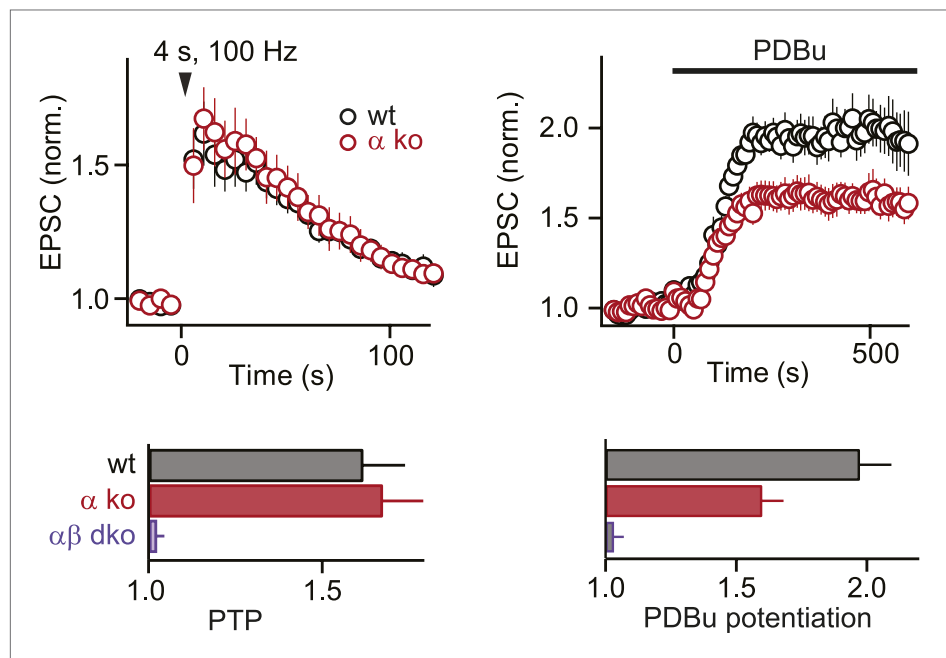

**Figure 1—figure supplement 3.** At the functionally mature calyx of Held, PKC<sub>Ca</sub> does not contribute to PTP but plays a small role in phorbol ester-induced potentiation.  
DOI: [10.7554/eLife.03011.008](https://doi.org/10.7554/eLife.03011.008)

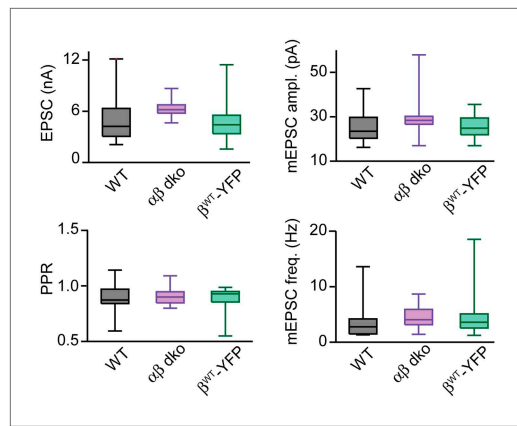

**Figure 1—figure supplement 4.** PKC $_{Ca}$  isoforms do not regulate basal synaptic properties.

DOI: [10.7554/eLife.03011.009](https://doi.org/10.7554/eLife.03011.009)

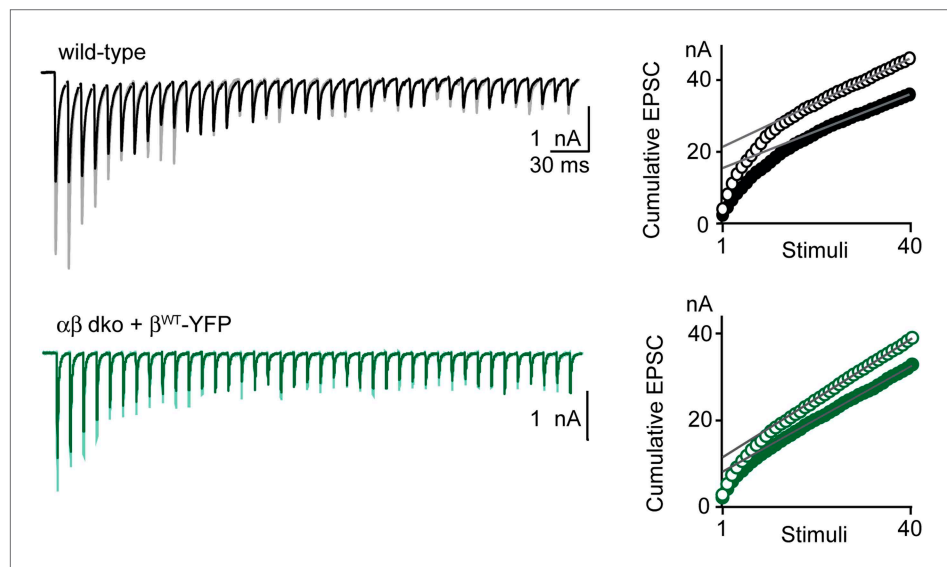

**Figure 1—figure supplement 5.** Determining the contributions of RRP and  $p$  in wild-type and rescued PTP at the functionally mature calyx of Held.

DOI: [10.7554/eLife.03011.010](https://doi.org/10.7554/eLife.03011.010)

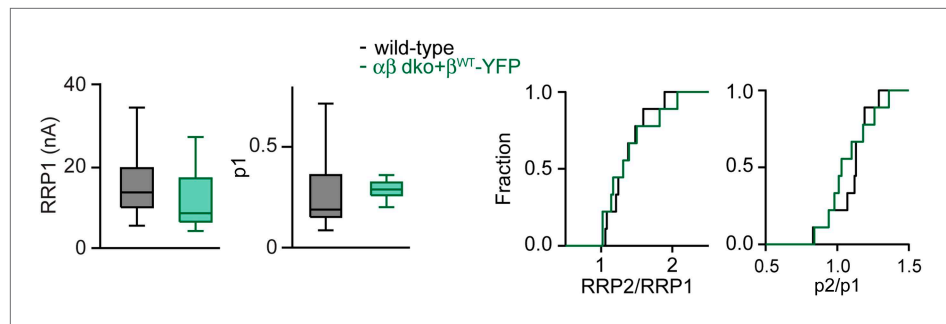

**Figure 1—figure supplement 6.** Determining the contributions of RRP and  $p$  in wild-type and rescued PTP at the functionally mature calyx of Held.

DOI: [10.7554/eLife.03011.011](https://doi.org/10.7554/eLife.03011.011)

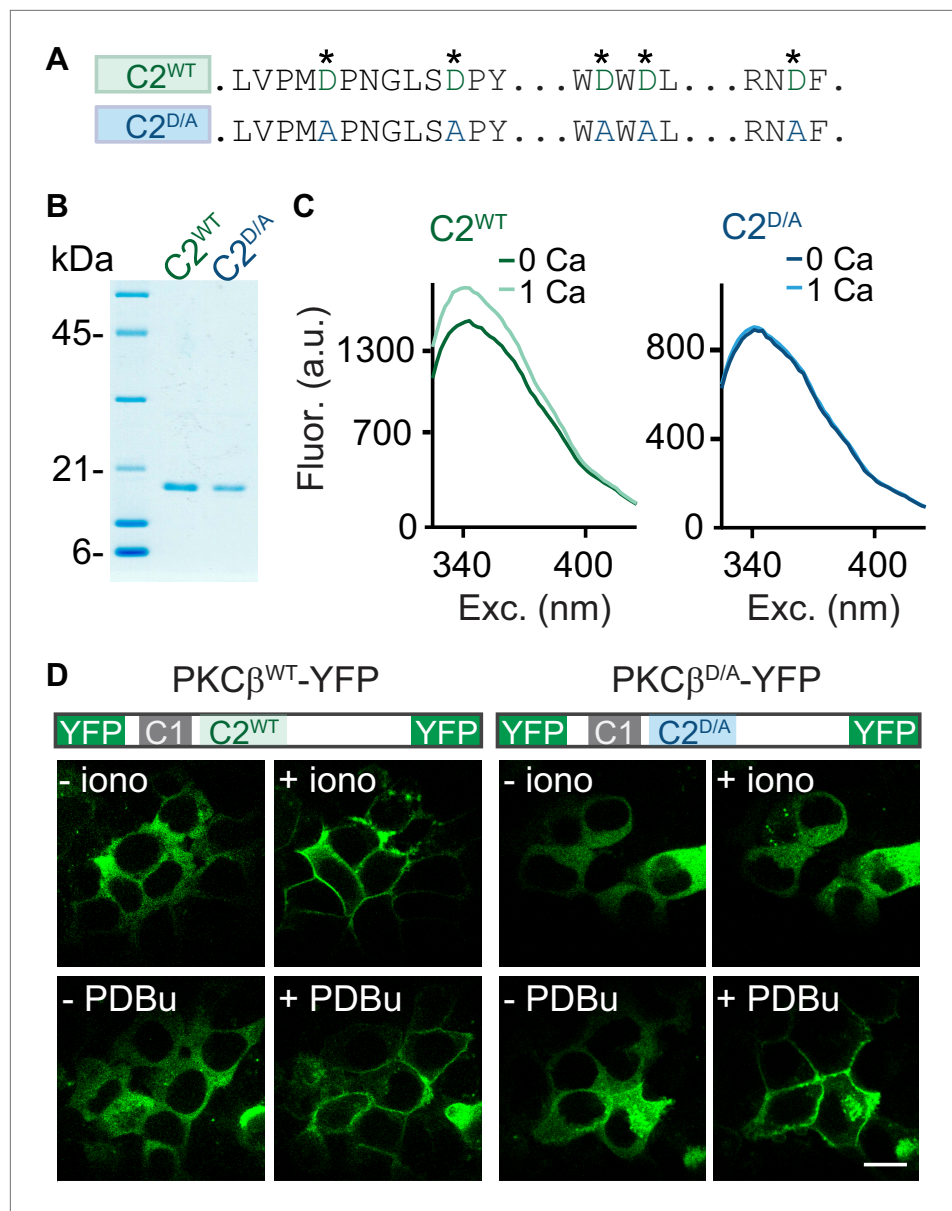

**Figure 2.** C2-domain mutations of PKCβ abolish Ca<sup>2+</sup> binding and Ca<sup>2+</sup>-induced translocation without impairing phorbol ester-induced translocation. (A) A partial sequence of the PKCβ C2 domain is shown with Ca<sup>2+</sup>-coordinating aspartates in green. These aspartates were mutated to alanines (blue) in the C2<sup>D/A</sup> construct. Also see **Figure 2—figure supplement 1**. (B) Coomassie blue-stained gel of recombinant wild-type (C2<sup>WT</sup>) and mutant (C2<sup>D/A</sup>) PKCβ C2 domains. (C) Averaged intrinsic tryptophan fluorescence is shown for C2<sup>WT</sup> and C2<sup>D/A</sup>. Fluorescence emission spectra were recorded in 0 mM Ca<sup>2+</sup> (*bold traces*) and 1 mM Ca<sup>2+</sup> (*light traces*). Peak fluorescence intensity change: C2<sup>WT</sup>: 17 ± 1.3%; C2<sup>D/A</sup>: -1.3 ± 2.0%. (D) Translocation of PKCβ<sup>WT</sup>-YFP (left) and PKCβ<sup>D/A</sup>-YFP (right) in HEK293T cells was monitored in response to the Ca<sup>2+</sup> ionophore ionomycin and in response to PDBu. Ca<sup>2+</sup> increases caused PKCβ<sup>WT</sup>-YFP to translocate, but not PKCβ<sup>D/A</sup>-YFP. Both PKCβ<sup>WT</sup>-YFP and PKCβ<sup>D/A</sup>-YFP translocated in response to PDBu. Scale bar: 10 μm.

DOI: [10.7554/eLife.03011.012](https://doi.org/10.7554/eLife.03011.012)

PKC $\beta$  C2<sup>WT</sup>

157 ERRGRIYIQAHDREVLIVVRDAKNLVPM<sup>D</sup>PNGLS<sup>D</sup>PYVKLKLIPDPKSESKQKTKTIK  
 217 CSLNPEWNETFRFQLKESDKDRRLSVEIWD<sup>D</sup>DLTSRND<sup>D</sup>FMGSL<sup>D</sup>SFGISELQKAGVDGWFK  
 277 LLSQEEGEYFNVPVPPEG

PKC $\beta$  C2<sup>D/A</sup>

157 ERRGRIYIQAHDREVLIVVRDAKNLVPM<sup>A</sup>PNGLS<sup>A</sup>PYVKLKLIPDPKSESKQKTKTIK  
 217 CSLNPEWNETFRFQLKESDKDRRLSVEIWA<sup>A</sup>LT<sup>A</sup>SRNA<sup>A</sup>FMGSL<sup>A</sup>SFGISELQKAGVDGWFK  
 277 LLSQEEGEYFNVPVPPEG

**Figure 2—figure supplement 1.** Protein sequence alignment for PKC $\beta$  C2<sup>WT</sup> and PKC $\beta$  C2<sup>D/A</sup>.

DOI: [10.7554/eLife.03011.013](https://doi.org/10.7554/eLife.03011.013)



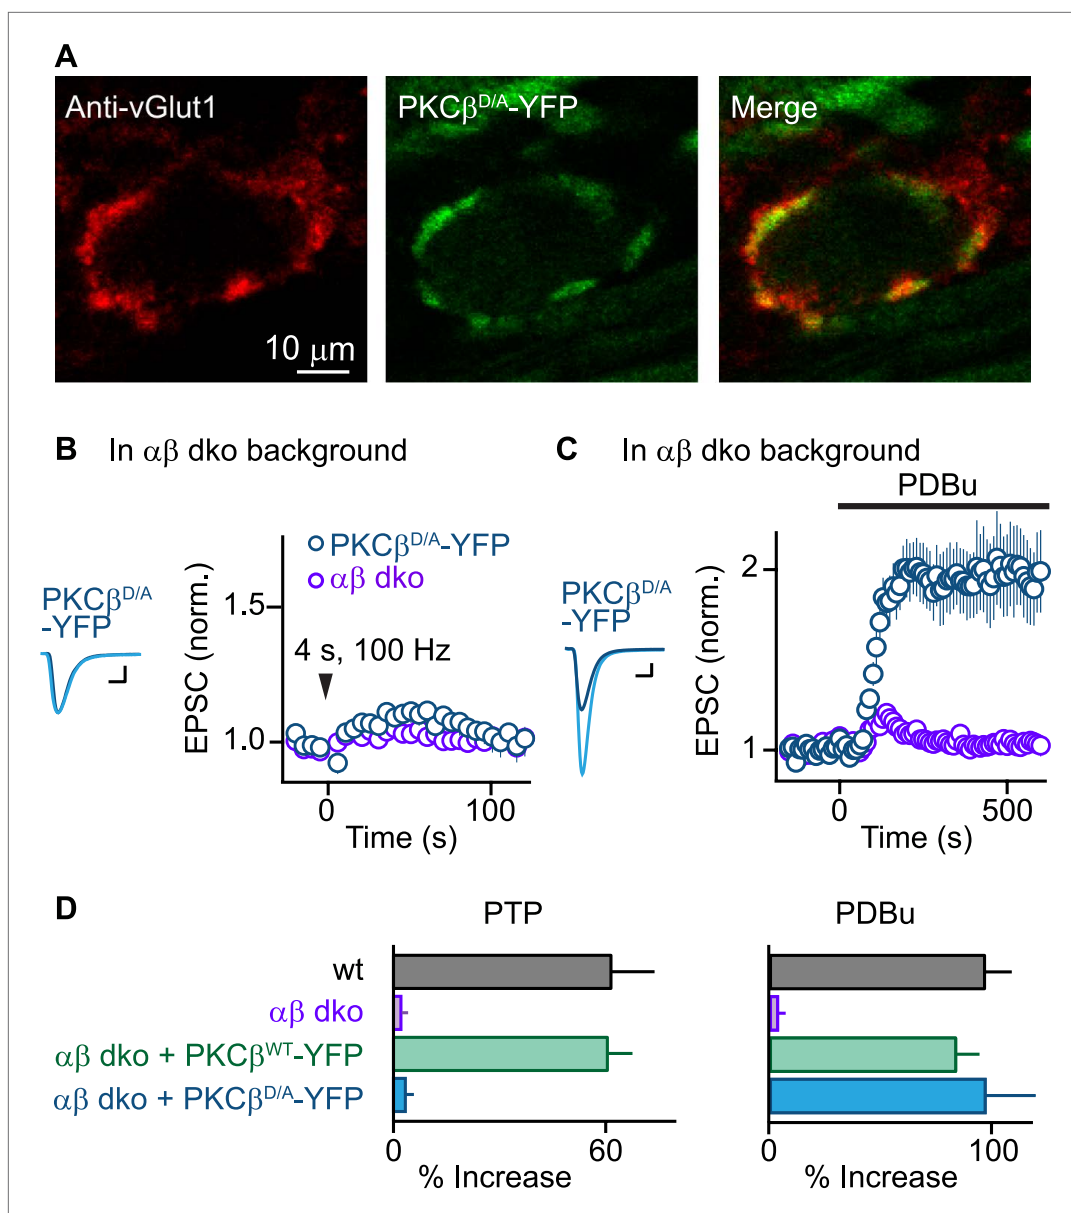

**Figure 3.** PTP requires  $\text{Ca}^{2+}$  binding to PKC $\beta$  but phorbol ester-induced potentiation does not. **(A)** Confocal images of a brain section labeled with an antibody against vGlut1 (red) are shown for a calyx of Held expressing PKC $\beta^{D/A}$ -YFP (green) in a PKC $\alpha\beta$  dko animal. **(B and C)** Synaptic plasticity was examined in PKC $\alpha\beta$  dko animals at calyces of Held expressing  $\text{Ca}^{2+}$ -insensitive PKC $\beta$  (PKC $\beta^{D/A}$ -YFP, blue traces). Representative traces and time-courses (mean  $\pm$  SEM) are shown following tetanic stimulation **(B)** and during bath application of PDBu **(C)**. For **(B)**, PKC $\beta^{D/A}$ :  $3.6 \pm 2.2\%$ ; for **(C)**, PKC $\beta^{D/A}$ :  $98 \pm 23\%$ . Scale bars: 1 nA, 1 ms. In **(B and C)**, the  $\alpha\beta$  dko group data from **Figure 1B,C** respectively are re-plotted for comparison. For basal synaptic properties of the PKC $\beta^{D/A}$ -YFP-expressing group, see **Figure 3—figure supplement 1** and **Figure 3—source data 2**. **(D)** Summary plots (mean  $\pm$  SEM) of the magnitude of synaptic enhancement produced by tetanic stimulation (left) and by PDBu (right). Source data are provided in **Figure 3—source data 1 and 2**. See also **Figure 1—source data 1 and 2**.

DOI: [10.7554/eLife.03011.014](https://doi.org/10.7554/eLife.03011.014)

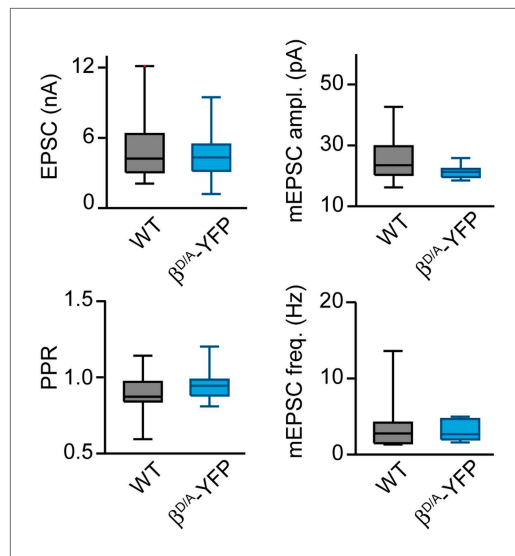

**Figure 3—figure supplement 1.** Basal synaptic properties are not altered by PKC $\beta^{D/A}$ -YFP expression. DOI: [10.7554/eLife.03011.017](https://doi.org/10.7554/eLife.03011.017)
